# Supplementary material
Source: PubMed Central journal article supplement (PMC5091673)
Supplement: supp_nsw081_Supplementary_materials.pdf [file supp_nsw081_Supplementary_materials.pdf]

**Table Supplement A.** Parameter estimates for Dyadic Multilevel models of P2 response and slow wave as a function of psychological distress and excluder identity and age in best friend dyads

| P2 response       | Estimate | (SE) | $t^a$ | $p^b$     | $CI_{95}^c$ |       |
|-------------------|----------|------|-------|-----------|-------------|-------|
|                   |          |      |       |           | Lower       | Upper |
| Intercept         | 10.29    | 3.30 | 3.11  | 0.003**   | 3.65        | 16.94 |
| Excluder Identity | -2.00    | 0.71 | -2.79 | 0.008**   | -3.45       | -0.54 |
| Age               | -0.68    | 0.30 | -2.25 | 0.029**   | -1.29       | -0.73 |
| Actor Distress    | 0.35     | 0.48 | 0.73  | 0.467     | -0.61       | 1.31  |
| Actor Distress*   | -3.99    | 0.90 | -4.42 | <0.001*** | -5.79       | -2.19 |
| Excluder Identity |          |      |       |           |             |       |
| Slow wave         | Estimate | (SE) | $t^a$ | $p^b$     | $CI_{95}^c$ |       |
|                   |          |      |       |           | Lower       | Upper |
| Intercept         | 4.08     | 4.58 | 0.89  | 0.378     | -5.14       | 13.31 |
| Excluder Identity | -3.18    | 0.99 | -3.22 | 0.003*    | 5.19        | -1.17 |
| Age               | -0.49    | 0.42 | -1.16 | 0.249     | -1.34       | 0.35  |
| Actor Distress    | -0.31    | 0.67 | -0.46 | 0.642     | -1.67       | 1.03  |
| Actor Distress*   | -4.98    | 1.26 | -3.95 | <0.001*** | -7.51       | -2.46 |
| Excluder Identity |          |      |       |           |             |       |

<sup>a</sup>Degrees of freedom are 18.14 for tests of intercepts for P2 and 36.78 for the tests of intercepts for slow wave; <sup>b</sup>All p-values are two tailed except in the case of variances, where one-tailed p-values are used (because variances are constrained to be non-negative); <sup>c</sup>Confidence intervals for variances were computed using the Satterthwaite method; <sup>d</sup>Covariances for intercepts of P2 and slow wave were estimated but not reported for the sake of simplicity. \* $p \leq 0.05$ , 2-tailed; \*\* $p \leq 0.01$ , 2-tailed; \*\*\* $p \leq 0.001$ , 2-tailed

**Table Supplement B.** Associations between P2 and slow wave for favor events

| Favor Events | Psychological Distress | Ostracism |
|--------------|------------------------|-----------|
| P2 Friend    | - 0.196                | 0.078     |
| SW Friend    | - 0.094                | - 0.023   |
| P2 Stranger  | - 0.216                | - 0.332*  |
| SW Stranger  | - 0.288                | - 0.049   |

\* <.05, uncorrected

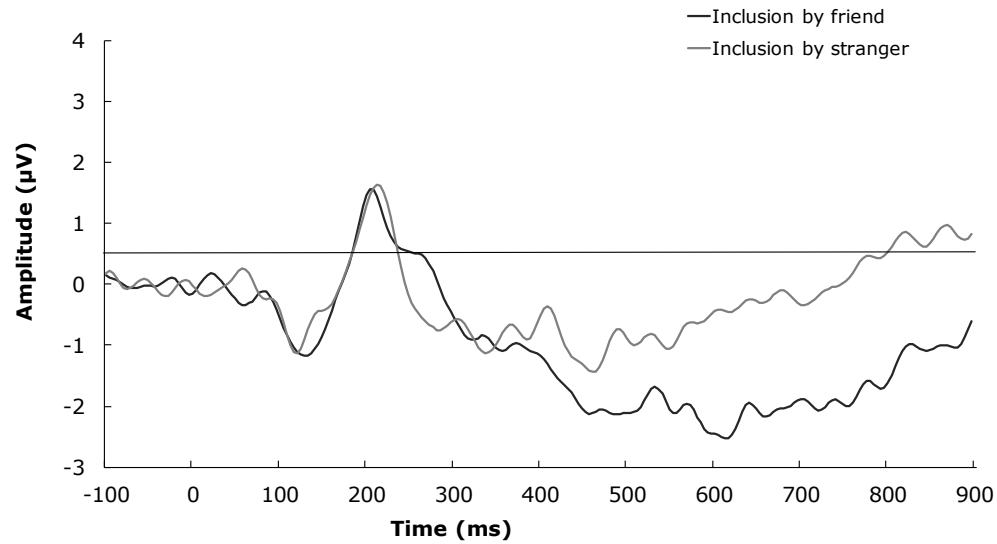

**Figure Supplement A.** Friend and stranger Inclusion-based ERPs for throws to the participant during Cyberball.
